# Supplementary material for: Generating Novel and Soluble Class II Fructose-1,6-Bisphosphate Aldolase with ProteinGAN
Source: MDPI journal article supplement (doi:10.3390/catal13121457), 2023-11-22
Supplement: s1 [file s1]

Archive with 1 entries (1 files):
- catalysts-2718366-supplementary.pdf
